# Supplementary material for: Effects of Resistant Starch on Symptoms, Fecal Markers and Gut Microbiota in Parkinson’s Disease – The RESISTA-PD Trial
Source: bioRxiv or medRxiv preprint supplement (doi:10.1101/2021.02.07.21251098), 2021-02-08

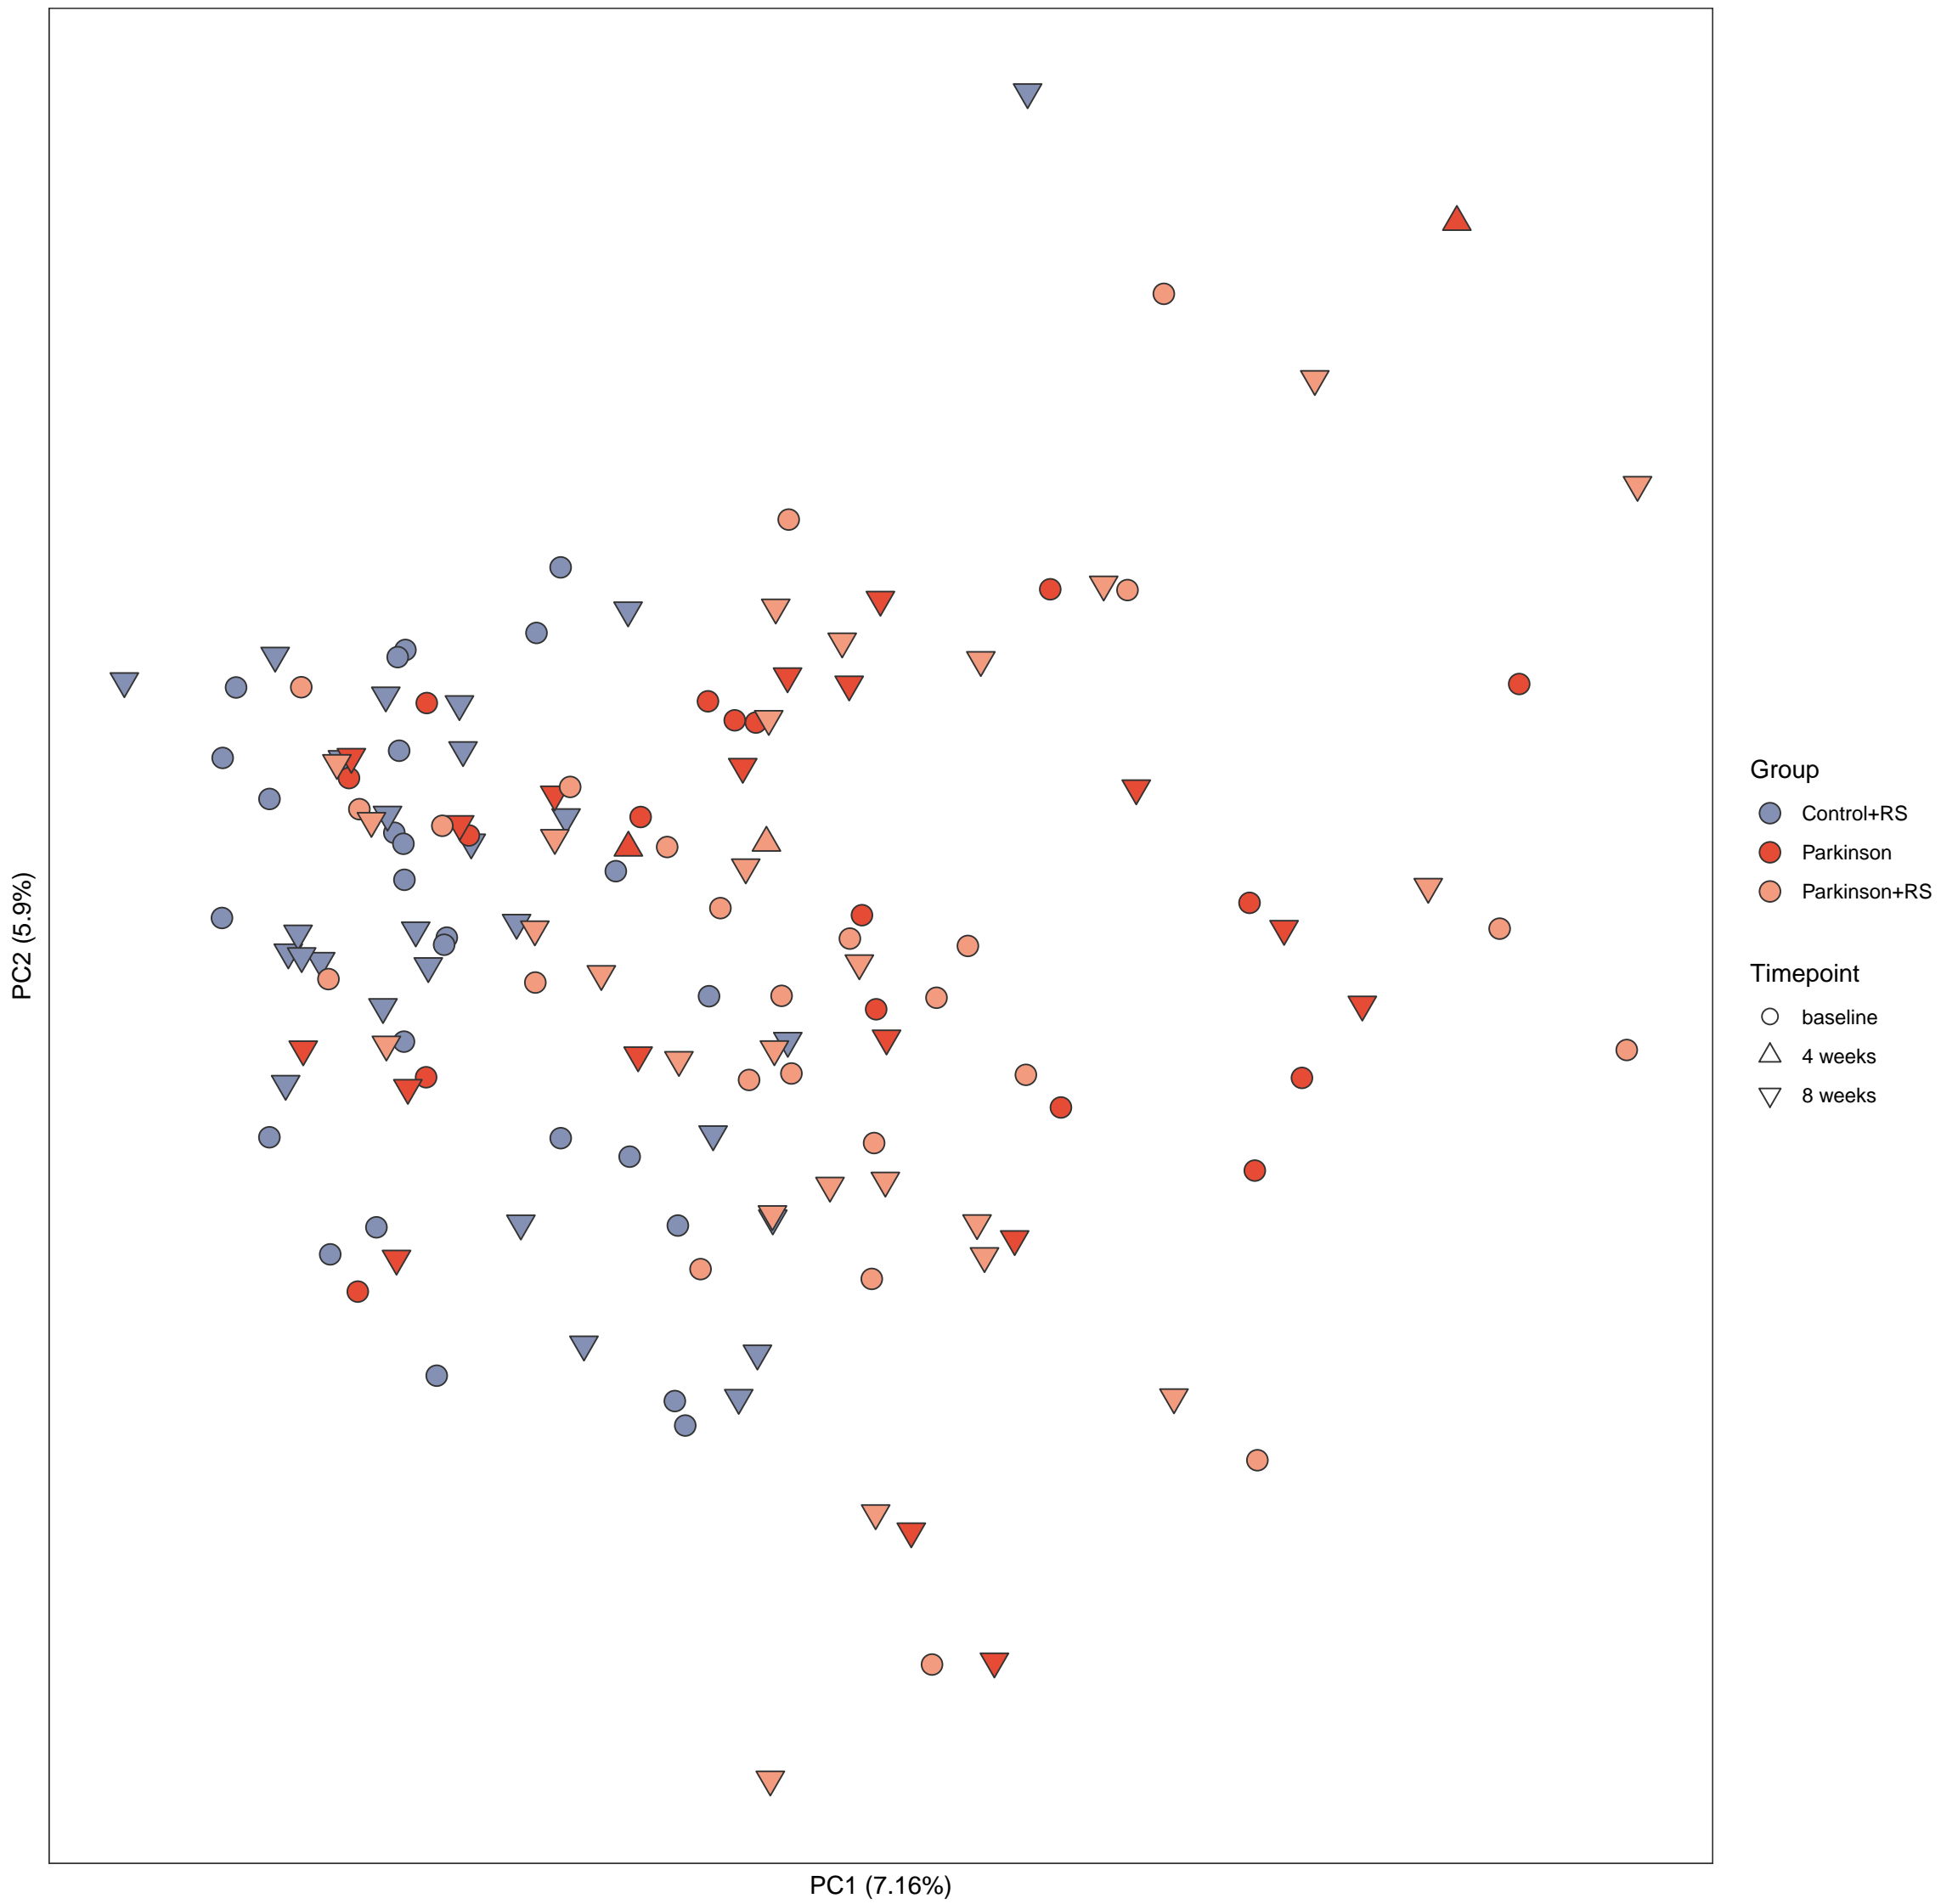

Supplement: Supplementary file [file media-5.pdf]
